# Supplementary material
Source: ML conference proceedings conference paper supplement (https://proceedings.mlr.press/v70/hornakova17a.html)
Supplement: Supplementary file [file hornakova17a-supp.pdf]

---

# Analysis and Optimization of Graph Decompositions by Lifted Multicuts (Supplement)

---

Andrea Horňáková<sup>\*1</sup> Jan-Hendrik Lange<sup>\*1</sup> Bjoern Andres<sup>1</sup>

## Appendix

### A. Multicuts

**Proof of Lemma 2** First, we show that for any  $\Pi \in D_G$ , the image  $\phi_G(\Pi)$  is a multicut of  $G$ . Assume the contrary, i.e. there exists a cycle  $C$  of  $G$  such that  $|C \cap \phi_G(\Pi)| = 1$ . Let  $\{u, v\} = e \in C \cap \phi_G(\Pi)$ , then for all  $U \in \Pi$  it holds that  $u \notin U$  or  $v \notin U$ . However,  $C \setminus \{e\}$  is a sequence of edges  $\{w_1, w_2\}, \dots, \{w_{k-1}, w_k\}$  such that  $u = w_1, v = w_k$  and  $\{w_i, w_{i+1}\} \notin \phi_G(\Pi)$  for all  $1 \leq i \leq k-1$ . Consequently, since  $\Pi$  is a partition of  $V$ , there exists some  $U \in \Pi$  such that

$$w_1 \in U \wedge w_2 \in U \wedge \dots \wedge w_{k-1} \in U \wedge w_k \in U.$$

This contradicts  $w_1 = u \notin U$  or  $w_k = v \notin U$ .

To show injectivity of  $\phi_G$ , let  $\Pi = \{U_1, \dots, U_k\}$ ,  $\Pi' = \{U'_1, \dots, U'_l\}$  be two decompositions of  $G$ . Suppose  $\Pi \neq \Pi'$ . Then (w.l.o.g.) there exist some  $u, v \in V$  with  $\{u, v\} \in E$  and some  $U_i \in \Pi$  such that  $u, v \in U_i$  and for all  $U'_j \in \Pi'$  it holds that  $u \notin U'_j$  or  $v \notin U'_j$ . Thus,  $\{u, v\} \in \phi_G(\Pi)$  but  $\{u, v\} \notin \phi_G(\Pi')$ , which means  $\phi_G(\Pi) \neq \phi_G(\Pi')$ .

For surjectivity, take some multicut  $M \subseteq E$  of  $G$ . Let  $\Pi = \{U_1, \dots, U_k\}$  collect the node sets of the connected components of the graph  $(V, E \setminus M)$ . Apparently,  $\Pi$  defines a decomposition of  $G$ . We have  $\{u, v\} \in \phi_G(\Pi)$  if and only if for all  $U \in \Pi$  it holds that  $v \notin U$  or  $u \notin U$ . The latter holds true if and only if  $\{u, v\}$  is not contained in any connected component of  $(V, E \setminus M)$ , which is equivalent to  $\{v, w\} \in M$ . Hence,  $\phi_G(\Pi) = M$ .

**Proof of Lemma 4** First, we show that for any  $M \in M_{K_V}$  the image  $\psi(M)$  is an equivalence relation on  $V$ . Since  $K_V$  is simple, we trivially have  $\{v, v\} \notin M$  for any  $v \in V$ . Therefore,  $(v, v) \in \psi(M)$ , which means  $\psi(M)$  is reflexive. Symmetry of  $\psi(M)$  follows from  $\{u, v\} =$

$\{v, u\}$  for all  $u, v \in V$ . Now, suppose  $(u, v), (v, w) \in \psi(M)$ . Then  $\{u, v\}, \{v, w\} \notin M$  and thus  $\{u, w\} \notin M$  (otherwise  $C = \{u, v, w\}$  would be a cycle contradicting the definition of a multicut). Hence,  $(u, w) \in \psi(M)$ , which gives transitivity of  $\psi(M)$ .

Let  $M, M'$  be two multicuts of  $K_V$  with  $\psi(M) = \psi(M')$ . Then

$$\begin{aligned} \{u, v\} \in M &\iff (u, v) \notin \psi(M) \\ &\iff (u, v) \notin \psi(M') \\ &\iff \{u, v\} \in M'. \end{aligned}$$

Hence  $M = M'$ , so  $\psi$  is injective.

Let  $R$  be an equivalence relation on  $V$  and define  $M$  by

$$\{u, v\} \in M \iff (u, v) \notin R.$$

Transitivity of  $R$  implies that  $M$  is a multicut of  $K_V$ . Moreover, by definition, it holds that  $\psi(M) = R$ . Hence,  $\psi$  is also surjective.

### B. Lifted Multicuts

**Proof of Lemma 5** Let  $x \in \{0, 1\}^{E'}$  be such that  $M' = x^{-1}(1)$  is a multicut of  $G'$  lifted from  $G$ . Every cycle in  $G$  is a cycle in  $G'$ . Moreover, for any path  $vw = f \in F_{GG'}$  and any  $vw$ -path  $P$  in  $G$ , it holds that  $P \cup \{f\}$  is a cycle in  $G'$ . Therefore,  $x$  satisfies all inequalities (4) and (5). Assume  $x$  violates some inequality of (6). Then there is an edge  $vw \in F_{GG'}$  and some  $vw$ -cut  $C$  in  $G$  such that  $x_{vw} = 0$  and for all  $e \in C$  we have  $x_e = 1$ . Let  $\Pi$  be the partition of  $V$  corresponding to  $M'$  according to Lemma 2. There exists some  $U \in \Pi$  with  $v \in U$  and  $w \in U$ . However, for any  $uu' = e \in C$  it holds that  $u \notin U$  or  $u' \notin U$ . This means the subgraph  $(U, E \cap \binom{U}{2})$  is not connected, as  $C$  is a  $vw$ -cut. Hence,  $\Pi$  is not a decomposition of  $G$ , which is a contradiction, because  $G$  is connected.

Now, suppose  $x \in E'$  satisfies all inequalities (4)–(6). We show first that  $M' = x^{-1}(1)$  is a multicut of  $G'$ . Assume the contrary, then there is a cycle  $C'$  in  $G'$  and some edge  $e'$  such that  $C' \cap M' = \{e'\}$ . For every  $vw = f \in F_{GG'} \cap C' \setminus \{e'\}$  there exists a  $vw$ -path  $P$  in  $G$  such that  $x_e = 0$  for all  $e \in P$ . Otherwise there would be some  $vw$ -cut in  $G$

---

<sup>\*</sup>Equal contribution <sup>1</sup>Max Planck Institute for Informatics, Saarbrücken, Germany. Correspondence to: Bjoern Andres <andres@mpi-inf.mpg.de>.

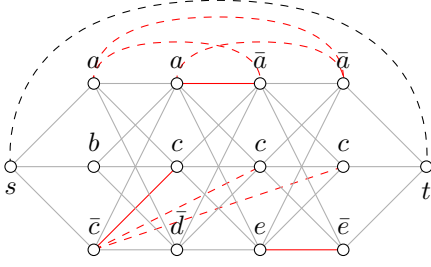

Figure 1. To show that the consistency problem is NP-hard, we reduce 3-SAT to this problem. Shown above is the instance of the consistency problem constructed for the instance of 3-SAT given by the form  $(a \vee b \vee \bar{c}) \wedge (a \vee c \vee d) \wedge (\bar{a} \vee c \vee e) \wedge (\bar{a} \vee c \vee \bar{e})$ . Solid and dashed lines depict edges in  $E$  and  $E' \setminus E$ , respectively. Black means  $\tilde{x}_e = 0$ . Red means  $\tilde{x}_e = 1$ . Grey means  $e \notin \text{dom } \tilde{x}$ .

violating (6), as  $G$  is connected. If we replace every such  $f$  with its associated path  $P$  in  $G$ , then the resulting cycle violates either (4) (if  $e' \in E$ ) or (5) (if  $e' \in F_{GG'}$ ). Thus,  $M'$  is a multicut of  $G'$ . By connectivity of  $G$ , the partition  $\phi_{G'}^{-1}(M')$  is a decomposition of both  $G'$  and  $G$ . Therefore,  $M = \lambda_{GG'}^{-1}(M') = \phi_G(\phi_{G'}^{-1}(M'))$  is a multicut of  $G$  and hence  $M' = x^{-1}(1)$  is indeed lifted from  $G$ .

### C. Partial Lifted Multicuts

**Proof of Theorem 1** Firstly, we show that the consistency problem is in NP. For that, we show that verifying, for any given  $x \in \{0, 1\}^{E'}$ , that  $x$  is a completion of  $\tilde{x}$  and a characteristic function of a multicut of  $G'$  lifted from  $G$  is a problem of polynomial time complexity. To verify that  $x$  is a completion of  $\tilde{x}$ , we verify for every  $e \in \text{dom } \tilde{x}$  that  $x_e = \tilde{x}_e$ . This takes time  $O(|E|)$ . To verify that  $x^{-1}(1)$  is a multicut of  $G'$  lifted from  $G$ , we employ a disjoint set data structure initialized with singleton sets  $V$ . For any  $\{v, w\} \in x^{-1}(0)$ , we call  $\text{union}(v, w)$ . Then, we verify for every  $\{v, w\} \in x^{-1}(1)$  that  $\text{find}(v) \neq \text{find}(w)$ . This takes time  $O(|E| + |V| \log |V|)$ .

To show that the consistency problem is NP-hard, we reduce 3-SAT to this problem. For that, we consider any instance of 3-SAT defined by a propositional logic formula  $A$  in 3-SAT form. An example is shown in Fig. 1. Let  $m$  be the number of variables and  $n$  the number of clauses in  $A$ .

In order to define an instance of the consistency problem w.r.t. this instance of 3-SAT, we construct in polynomial time a connected graph  $G = (V, E)$ , a graph  $G' = (V, E')$  with  $E \subseteq E'$ , and a partial characteristic function  $\tilde{x} \in \{0, 1, *\}^{E'}$  as described below. An example of this construction is shown in Fig. 1.

- There are  $3n + 2$  nodes in  $V$ . Two nodes are denoted by  $s$  and  $t$ . Additional nodes are organized in  $n$  layers. For  $j \in \{1, \dots, n\}$ , the  $j$ -th layer corresponds to the

$j$ -th clause in  $A$ , containing one node for each of the three literals<sup>1</sup> in the clause. Every node is labeled with its corresponding literal. Layer 0 contains only the node  $s$ . Layer  $n + 1$  contains only the node  $t$ .

- Any two consecutive layers are connected such that their nodes together induce a complete bipartite subgraph of  $G$ . Additionally, any nodes  $v$  and  $w$  labeled with conflicting literals,  $a$  and  $\bar{a}$ , that are not already connected in  $G$  are connected in  $G'$  by an edge  $\{v, w\} \in E' \setminus E$ .
- For any edge  $\{v, w\} \in E'$  whose nodes  $v$  and  $w$  are labeled with conflicting literals, we set  $\tilde{x}_{vw} = 1$ . In addition, we introduce the edge  $\{s, t\} \in E' \setminus E$  and define  $\tilde{x}_{st} = 0$ . No other edges are in the domain of  $\tilde{x}$ .

Observe that  $\tilde{x}$  is consistent iff there exists an  $st$ -path  $P$  in  $G$  such that no edge or chord  $\{v, w\}$  of  $P$  is such that  $\tilde{x}_{vw} = 1$ . Any such path is called feasible. All other  $st$ -paths in  $G$  are called infeasible.

Now, we show firstly that the existence of a feasible path implies the existence of a solution to the given instance of 3-SAT. Secondly, we show that the existence of a solution to the given instance of 3-SAT implies the existence of a feasible path. That suffices.

1. Let  $P$  be a feasible path and let  $V_P$  its node set. An assignment  $\chi$  to the variables of the instance of 3-SAT is constructed as follows: For any node  $v \in V_P$  whose label is a variable  $a$ , we define  $\chi(a) := \text{true}$ . For any node  $v \in V_P$  whose label is a negated variable  $\bar{a}$ , we define  $\chi(a) := \text{false}$ . All remaining variables are assigned arbitrary truth values. By the properties of  $P$ ,  $\chi$  is well-defined and  $A[\chi]$  is true.
2. Let  $\chi$  be a solution to the given instance of 3-SAT. As every clause of  $A$  contains one literal that is true, and by construction of  $G$ , we can choose an  $st$ -path in  $G$  along which all nodes are labeled with literals that are true for the assignment  $\chi$ . By virtue of  $\chi$  being a solution to the instance of 3-SAT, any pair of literals that are both true are non-conflicting. Thus,  $P$  has no edge or chord  $\{v, w\}$  such that  $\tilde{x}_{vw} = 1$ .

**Proof of Lemma 6** Firstly, suppose that  $E \subseteq \text{dom } \tilde{x}$ . In this case, it is clear that  $\tilde{x}$  is consistent iff  $\tilde{x}$  satisfies all cycle inequalities (4) w.r.t. the graph  $(V, E \cap \text{dom } \tilde{x})$ . This can be checked in time  $O(|V| + |E'|)$  as follows: Label the maximal components of the subgraph  $G_{\tilde{x}}$  of  $G$  induced by the edge set  $\{e \in E : \tilde{x}_e = 0\}$ . Then, for every  $\{v, w\} \in E'$  with  $\tilde{x}_{vw} = 1$ , check if  $v$  and  $w$  are in distinct maximal

<sup>1</sup>A literal is either a variable  $a$  or a negated variable  $\bar{a}$ .

components of  $G_{\tilde{x}}$ . If so,  $\tilde{x}$  is consistent, otherwise  $\tilde{x}$  is inconsistent.

Now, suppose  $\tilde{x} \in \{0, 1, *\}^{E'}$  satisfies (10). We show that, similar to the first case,  $\tilde{x}$  is consistent iff all inequalities (4) and (5) are satisfied w.r.t. the graph  $(V, E' \cap \text{dom } \tilde{x})$ . This can be checked analogously to the first case.

Necessity of this condition is clear. To show sufficiency, assume this condition holds true. We construct some  $x \in X_{GG'}[\tilde{x}]$  as follows. For all  $e \in \text{dom } \tilde{x}$ , set  $x_e := \tilde{x}_e$ . For all  $\{v, w\} = f \in E' \setminus E$  such that  $f \notin \text{dom } \tilde{x}$  and such that there is a  $vw$ -path  $P$  in  $G$  with  $\tilde{x}_e = 0$  for all  $e \in P$ , set  $x_f := 0$ . For all remaining edges  $e$ , set  $x_e := 1$ . By construction,  $x$  satisfies (4), (5) and (6).

**Proof of Theorem 2** To show that the maximal specificity problem is NP-hard, we reduce 3-SAT to this problem: For any given instance of 3-SAT we construct in polynomial time a connected graph  $G = (V, E)$ , a graph  $G' = (V, E')$  with  $E \subseteq E'$ , and a partial characteristic function  $\tilde{x} \in \{0, 1, *\}^{E'}$  as in the proof of Thm. 1, except that now, we let  $st \notin \text{dom } \tilde{x}$ .

We know that  $\tilde{x}$  is consistent because  $\mathbb{1} \in X_{GG'}[\tilde{x}]$ . We show that  $\tilde{x}$  is maximally specific iff the given instance of 3-SAT has a solution:

Firstly, every  $e \in E' \setminus (\text{dom } \tilde{x} \cup \{st\})$  is undecided, by the following argument: (i) There exists an  $x \in X_{GG'}[\tilde{x}]$  with  $x_e = 1$ , namely  $\mathbb{1}$ . (ii) There exists an  $x \in X_{GG'}[\tilde{x}]$  with  $x_e = 0$ , namely the  $x \in \{0, 1\}^{E'}$  with  $x_e = 0$  and  $\forall f \in E' \setminus \{e\} : x_f = 1$ . To see that  $x \in X_{GG'}[\tilde{x}]$ , observe that  $e \in E$  and  $\tilde{x}^{-1}(0) = \emptyset$ . Thus,  $st$  is the only edge in  $E' \setminus \text{dom } \tilde{x}$  that is possibly decided. That is:

$$E'[\tilde{x}] \subseteq \{st\} \cup \text{dom } \tilde{x} \quad (42)$$

Thus,  $\tilde{x}$  is maximally specific iff  $\tilde{x}$  is undecided. More specifically,  $\tilde{x}$  is maximally specific iff there exists an  $x \in X_{GG'}[\tilde{x}]$  with  $x_{st} = 0$ , as we know of the existence of  $\mathbb{1} \in X_{GG'}[\tilde{x}]$ . Thus,  $\tilde{x}$  is maximally specific iff the given instance of 3-SAT has a solution, by the arguments made in the proof of Thm. 1.

**Proof of Lemma 7** Observe that  $\tilde{x}$  is maximally specific iff  $\text{cl}_{GG'} \tilde{x} = \tilde{x}$ . Thus, Lemma 7 follows from Lemma 11.

**Proof of Lemma 8** Reflexivity is obvious. Antisymmetry:  $(\tilde{x} \leq \tilde{x}' \wedge \tilde{x}' \leq \tilde{x}) \Rightarrow (\text{dom } \tilde{x} = \text{dom } \tilde{x}' \wedge \forall e \in \text{dom } \tilde{x} : \tilde{x}_e = \tilde{x}'_e)$ . Transitivity: Let  $\tilde{x} \leq \tilde{x}' \leq \tilde{x}''$ . Then  $\text{dom } \tilde{x} \subseteq \text{dom } \tilde{x}' \subseteq \text{dom } \tilde{x}''$  and  $\forall e \in \text{dom } \tilde{x} : \tilde{x}_e = \tilde{x}'_e = \tilde{x}''_e$ .

**Proof of Lemma 9** We show first that  $\tilde{x}'$  is maximal w.r.t.  $\leq$  in  $\tilde{X}_{GG'}[\tilde{x}]$  iff it is maximally specific. This implies

existence and uniqueness of the maximum of  $\tilde{X}_{GG'}[\tilde{x}]$  by construction via  $\text{dom } \tilde{x}' = E'[\tilde{x}]$ .

Let  $\tilde{x}' \in \tilde{X}_{GG'}[\tilde{x}]$  be maximally specific and suppose  $\tilde{x}' \leq \tilde{x}''$  for some  $\tilde{x}'' \in \tilde{X}_{GG'}[\tilde{x}]$ . Then  $\text{dom } \tilde{x}'' = \text{dom } \tilde{x}'$ , since  $X_{GG'}[\tilde{x}'] \neq X_{GG'}[\tilde{x}'']$  if  $\text{dom } \tilde{x}'' \setminus E'[\tilde{x}] \neq \emptyset$ . Thus,  $\tilde{x}' = \tilde{x}''$ , which means  $\tilde{x}'$  is maximal w.r.t.  $\leq$  in  $\tilde{X}_{GG'}[\tilde{x}]$ .

Conversely, any maximal element  $\tilde{x}'$  of  $\tilde{X}_{GG'}[\tilde{x}]$  w.r.t.  $\leq$  must satisfy  $E'[\tilde{x}] \subseteq \text{dom } \tilde{x}'$ , which means it is maximally specific.

Hence, the unique maximum  $\tilde{x}' \in \tilde{X}_{GG'}[\tilde{x}]$  is obtained as follows. For an arbitrary  $x \in X_{GG'}[\tilde{x}]$  define  $\tilde{x}'$  via  $\tilde{x}'_e := x_e$  for all decided edges  $e \in E'[\tilde{x}]$ .

**Proof of Theorem 3** Let us have  $\tilde{x}, \tilde{x}' \in \tilde{X}_{GG'}$ .

- The implication  $X_{GG'}[\tilde{x}] = X_{GG'}[\tilde{x}'] \Rightarrow \tilde{X}_{GG'}[\tilde{x}] = \tilde{X}_{GG'}[\tilde{x}']$ : follows from the definition of  $\tilde{X}_{GG'}[\tilde{x}]$  in Lemma 9.
- The implication  $\tilde{X}_{GG'}[\tilde{x}] = \tilde{X}_{GG'}[\tilde{x}'] \Rightarrow \text{cl}_{GG'} \tilde{x} = \text{cl}_{GG'} \tilde{x}'$  follows from the definition of the closure of  $\tilde{x}$  as the maximum of  $\tilde{X}_{GG'}[\tilde{x}]$ .
- The implication  $\text{cl}_{GG'} \tilde{x} = \text{cl}_{GG'} \tilde{x}' \Rightarrow X_{GG'}[\tilde{x}] = X_{GG'}[\tilde{x}']$  follows from  $\text{cl}_{GG'} \tilde{x} = \text{cl}_{GG'} \tilde{x}' \in \tilde{X}_{GG'}[\tilde{x}]$ .

**Proof of Lemma 10** Let  $x \in X_G$  and define  $y = \text{cl}_{GG'} x$ . Since  $\text{dom } x = E$ , it holds that  $E'[x] = E'$ , i.e. all edges are decided. Therefore,  $y^{-1}(1)$  is a multicut of  $G'$  and for all  $\{v, w\} = f \in E' \setminus E$  it holds that  $y_f = 0$  iff there is a  $vw$ -path  $P$  in  $G$  such that  $x_e = 0$  for all  $e \in P$ . By Lemma 5, this implies  $y^{-1}(1) = \lambda_{GG'}(x^{-1}(1))$ .

**Proof of Theorem 4** Computing closures is at least as hard as deciding maximal specificity: To decide maximal specificity of  $\tilde{x} \in \tilde{X}_{GG'}$ , compute its closure  $\text{cl}_{GG'} \tilde{x}$ . Then  $\tilde{x}$  is maximally specific iff  $\text{dom } \tilde{x} = \text{dom } \text{cl}_{GG'} \tilde{x}$ , i.e., if  $\tilde{x} = \text{cl}_{GG'} \tilde{x}$ . By Theorem 2, this means computing closures is NP-hard.

**Proof of Lemma 11** Let  $\tilde{x} \in \tilde{X}_{GG'}$  and  $\tilde{y} = \text{cl}_{GG'} \tilde{x}$ .

Suppose first that  $E = E'$ . We describe how to compute  $\tilde{y}$  efficiently. Obviously, we must set  $\tilde{y}_e = \tilde{x}_e$  for all  $e \in \text{dom } \tilde{x}$ . Furthermore, we must set  $\tilde{y}_{vw} = 0$  for all  $\{v, w\} \in E \setminus \text{dom } \tilde{x}$  such that there is a  $vw$ -path  $P$  in  $G$  with  $\tilde{x}_e = 0$  for all  $e \in P$ . Moreover, we must set  $\tilde{y}_{vw} = 1$  for all  $\{v, w\} \in E \setminus \text{dom } \tilde{x}$  that satisfy

$$\begin{aligned} \exists P \in vw\text{-paths}(G) \exists! e \in P : \\ \tilde{x}_e = 1 \wedge \forall e' \in P \setminus \{e\} : \tilde{x}_{e'} = 0 . \end{aligned} \quad (43)$$

Therefore, initialize a disjoint-set data structure with singleton sets  $V$ . Apply the union operation on all edges  $e \in \text{dom } \tilde{x}$  where  $\tilde{x}_e = 0$ , i.e. *contract* all 0-labeled edges. Then, set  $\tilde{y}_e = 0$  for all edges that connect nodes of the same component. If there is an edge  $e'$  between two components such that  $\tilde{x}_{e'} = 1$ , then for all edges  $e$  between those components set  $\tilde{y}_e = 1$ . The remaining edges are undecided by  $\tilde{x}$ . In case we only want to decide maximal specificity, we can stop upon finding the first edge  $e \in \text{dom } \tilde{y} \setminus \text{dom } \tilde{x}$ .

Now suppose that  $E \subseteq \text{dom } \tilde{x}$ . In this case, all edges are decided, because  $\tilde{x}|_E \in X_G$ . According to Lemma 10, the closure  $\tilde{y}$  corresponds to the lifting of  $\tilde{x}|_E$  to  $G'$ . Therefore, to obtain  $\tilde{y}$ , compute the decomposition of  $G$  associated to  $\tilde{x}|_E$  using, e.g., a disjoint-set data structure. Set  $\tilde{y}_e = 0$  if  $e$  is an edge within a component. Set  $\tilde{y}_e = 1$  if  $e$  is an edge between components.

## D. Metrics

**Proof of Theorem 5** Symmetry and non-negativity follow directly from the definition, and so does  $d_{E'}^\mu(x, x) = 0$  for all  $x \in X_{GG''}$ . For any  $e \in E'$ , the form  $d_e^1$  on  $E' \times E'$  is a Hamming metric on words of length 1 from the alphabet  $\{0, 1\}$ . Therefore, it satisfies the triangle inequality. Hence, for any  $x, y, z \in X_{GG''}$ :

$$d_{E'}^\mu(x, z) = \sum_{e \in E'} \mu_e d_e^1(x, z) \quad (44)$$

$$\leq \sum_{e \in E'} \mu_e (d_e^1(x, y) + d_e^1(y, z)) \quad (45)$$

$$= \sum_{e \in E'} \mu_e d_e^1(x, y) + \sum_{e \in E'} \mu_e d_e^1(y, z) \quad (46)$$

$$= d_{E'}^\mu(x, y) + d_{E'}^\mu(y, z), \quad (47)$$

Thus,  $d_{E'}^\mu$  is a pseudo-metric on  $X_{GG''}$ .

If  $E \subseteq E'$ , then  $G' = G''$  and thus,  $X_{GG''} = X_{GG'} \subseteq X_G$ . For any two  $x, x' \in X_{GG''} \subseteq X_G$ , it holds that  $d_{E'}^\mu(x, x') = 0$  iff  $d_e^1(x, x') = 0$  for all  $e \in E'$ , i.e. iff  $x = x'$ . Conversely, suppose there exists some  $e \in E' \setminus E$ . Define  $x, x' \in X_{GG''}$  via  $x_{e'} = x'_{e'} = 1$  for all  $e' \in E' \setminus \{e\}$  and  $x_e = 1, x'_e = 0$ . It holds that  $x \neq x'$  but  $d_{E'}^\mu(x, x') = 0$ .

**Proof of Theorem 6** We first prove that  $\tilde{d}_{E'}^\theta$  is a metric on  $\tilde{X}_{GG'}$ . For any  $\tilde{x} \in \tilde{X}_{GG'}$ , we have  $\text{cl}_{GG'} \tilde{x} = \tilde{x}$ . Thus, for all  $\tilde{x}, \tilde{x}' \in \tilde{X}_{GG'}$ , we have  $\tilde{d}_{E'}^\theta(\tilde{x}, \tilde{x}') = d_{E'}^\theta(\tilde{x}, \tilde{x}')$ . Therefore, positive definiteness and symmetry are obvious from the definition of  $d_{E'}^\theta(\tilde{x}, \tilde{x}')$ . To establish the triangle inequality for  $d_{E'}^\theta$ , we prove it for  $\theta d_e^1$  and any edge  $e \in E'$ . Let  $\tilde{x}, \tilde{y}, \tilde{z} \in \tilde{X}_{GG'}$  and consider the inequality

$$\theta d_e^1(\tilde{x}, \tilde{z}) \leq \theta d_e^1(\tilde{x}, \tilde{y}) + \theta d_e^1(\tilde{y}, \tilde{z}). \quad (48)$$

Table 1. The left- and right-hand side of the inequality  $\theta d_e^1(\tilde{x}, \tilde{z}) \leq \theta d_e^1(\tilde{x}, \tilde{y}) + \theta d_e^1(\tilde{y}, \tilde{z})$  for all possible combinations of values  $\tilde{x}_e, \tilde{y}_e, \tilde{z}_e$  where  $\tilde{x}, \tilde{y}, \tilde{z} \in \tilde{X}_{GG'}$ . The right-hand side is always greater or equal the left-hand side iff  $0.5 \leq \theta$ .

| $\tilde{x}_e$ | $\tilde{y}_e$ | $\tilde{z}_e$ | lhs      | rhs       |
|---------------|---------------|---------------|----------|-----------|
| 0             | 0             | 0             | 0        | 0         |
| 1             | 1             | 1             | 0        | 0         |
| *             | *             | *             | 0        | 0         |
| 0             | *             | 1             | 1        | $2\theta$ |
| 0             | 1/0           | 1             | 1        | 1         |
| 0             | 0/*           | *             | $\theta$ | $\theta$  |
| 1             | 1/*           | *             | $\theta$ | $\theta$  |

In Tab. 1, the left-hand side and right-hand side of (48) are evaluated for all possible assignments of values to  $\tilde{x}_e, \tilde{y}_e, \tilde{z}_e$ . It is apparent from this table that (48) holds iff  $\theta \geq 0.5$ .

We now show that  $\tilde{d}_{E'}^\theta$  is a pseudo-metric on  $\tilde{X}_{GG'}$ . Symmetry and non-negativity are obvious from the definition. For all  $\tilde{x} \in \tilde{X}_{GG'}$ , we have  $\tilde{d}_{E'}^\theta(\tilde{x}, \tilde{x}) = 0$ . Since  $\tilde{d}_{E'}^\theta(\tilde{x}, \tilde{x}') = \tilde{d}_{E'}^\theta(\text{cl}_{GG'} \tilde{x}, \text{cl}_{GG'} \tilde{x}')$  and  $\text{cl}_{GG'} \tilde{x} \in \tilde{X}_{GG'}$  for any  $\tilde{x} \in \tilde{X}_{GG'}$ , the triangle inequality follows from the fact that  $\tilde{d}_{E'}^\theta$  is a metric on  $\tilde{X}_{GG'}$ .

Finally, it holds that  $\tilde{d}_{E'}^\theta(\tilde{x}, \tilde{x}') = 0$  iff  $\text{cl}_{GG'} \tilde{x} = \text{cl}_{GG'} \tilde{x}'$ , which in turn is equivalent to  $\tilde{X}_{GG'}[\tilde{x}] = \tilde{X}_{GG'}[\tilde{x}']$ , by Theorem 3. This proves property (24).

## E. Polyhedral Optimization

**Proof of Theorem 7** The all-one vector  $\mathbb{1} \in \{0, 1\}^{E'}$  is such that  $\mathbb{1} \in X_{GG'}$ .

For any  $e \in E$ ,  $x^e \in \{0, 1\}^{E'}$  such that  $x_e^e = 0$  and  $x_{E' \setminus \{e\}}^e = 1$  and  $x_{F_{GG'}}^e = 1$  holds  $x^e \in X_{GG'}$ .

For any  $f \in F_{GG'}$ , any  $f$ -feasible  $x^f \in \{0, 1\}^{E'}$  is such that  $x^f \in X_{GG'}$ . Moreover,  $x^f$  can be chosen such that one shortest path connecting the two nodes in  $f$  is the only component containing more than one node.

For any  $e \in E$ , let  $y^e \in \mathbb{R}^{E'}$  such that

$$y^e = \mathbb{1} - x^e. \quad (49)$$

For any  $f \in F_1$ , choose an  $f$ -feasible  $x^f$  and let  $y^f \in \mathbb{R}^{E'}$  such that

$$y^f = \mathbb{1} - x^f - \sum_{\{e \in E | x_e^f = 0\}} y^e. \quad (50)$$

For any  $n \in \mathbb{N}$  such that  $n > 1$  and any  $f \in F_n$ , choose an  $f$ -feasible  $x^f$  and let  $y^f \in \mathbb{R}^{E'}$  such that

$$y^f = \mathbb{1} - x^f - \sum_{\{f' \in F_{GG'} | f' \neq f \wedge x_{f'}^f = 0\}} y^{f'} - \sum_{\{e \in E | x_e^f = 0\}} y^e. \quad (51)$$



Here,  $\ell(f') < \ell(f) \leq n$ , by definition of  $f$ -feasibility. Thus, all  $y^{f'}$  are well-defined by induction (over  $n$ ).

Observe that  $\{y^e \mid e \in E'\}$  is the unit basis in  $\mathbb{R}^{E'}$ . Moreover, each of its elements is a linear combination of  $\{\mathbb{1} - x^e \mid e \in E'\}$  which is therefore linearly independent.

Thus,  $\{\mathbb{1}\} \cup \{x^e \mid e \in E'\}$  is affine independent. It is also a subset of  $X_{GG'}$  and, therefore, a subset of  $\Xi_{GG'}$ . Thus,  $\dim \Xi_{GG'} = |E'|$ .

**Proof of Lemma 12** Let  $\{v, w\} = f \in F_{GG'}$  and let  $d(v, w)$  the length of a shortest  $vw$ -path in  $G$ . Then,  $d(v, w) > 1$  because  $F_{GG'} \cap E = \emptyset$ .

If  $d(v, w) = 2$ , there exists a  $u \in V$  such that  $\{v, u\} \in E$  and  $\{u, w\} \in E$ . Moreover,  $\{v, u\} \notin F_{GG'}$  and  $\{u, w\} \notin F_{GG'}$ , as  $F_{GG'} \cap E = \emptyset$ . Thus,  $f \in F_1$ .

If  $d(v, w) = m$  with  $m > 2$ , consider any shortest  $vw$ -path  $P$  in  $G$ . Moreover, let  $F' \subseteq F_{GG'}$  such that, for any  $\{v', w'\} = f' \in F_{GG'}$ ,  $f' \in F'$  iff  $v' \in P$  and  $w' \in P$  and  $f' \neq f$ . If  $F' = \emptyset$  then  $f \in F_1$ . Otherwise:

$$\forall \{v', w'\} \in F' : d(v', w') < m \quad (52)$$

and thus:

$$\forall f' \in F' \exists n_{f'} \in \mathbb{N} : f' \in F_{n_{f'}} \quad (53)$$

by induction (over  $m$ ). Let

$$n = \max_{f' \in F'} n_{f'} . \quad (54)$$

Then,  $f \in F_{n+1}$ .

**Proof of Lemma 13** For any  $\{v, w\} = f \in F_{GG'}$ , let  $P$  be a shortest  $vw$ -path in  $G$  and let

$$F'_{GG'} := \{\{v', w'\} \in F_{GG'} \mid v' \in P \wedge w' \in P\} \quad (55)$$

$$F''_{GG'} := F_{GG'} \setminus F'_{GG'} . \quad (56)$$

Moreover, let  $x \in \{0, 1\}^{E'}$  with  $x_P = 0$  and  $x_{E \setminus P} = 1$  and  $x_{F'_{GG'}} = 0$  and  $x_{F''_{GG'}} = 1$ .  $P$  has no chord in  $E$ , because it is a shortest path. Thus,  $x \in X_{GG'}$ .

**Proof of Theorem 8** Let  $S = \{x \in X_{GG'} \mid x_e = 1\}$  and put  $\Sigma = \text{conv } S$ .

To show necessity, suppose there is some  $vw = f \in F_{GG'}$  such that  $e$  connects a pair of  $v$ - $w$ -cut-vertices. Then, for any  $vw$ -path  $P$  in  $G$ , either  $e \in P$  or  $e$  is a chord of  $P$ . We claim that we have  $x_f = 1$  for any  $x \in S$ . This gives  $\dim \Sigma \leq |E'| - 2$ , so the inequality  $x_e \leq 1$  cannot define a facet of  $\Xi_{GG'}$ . If there are no  $vw$ -paths that have  $e$  as a chord, then  $\{e\}$  is a  $vw$ -cut and the claim follows from the corresponding inequality of (6). Otherwise, every  $vw$ -path

$P$  that has  $e$  as a chord contains a subpath  $P'$  such that  $P' \cup \{e\}$  is a cycle. Thus, for any  $x \in S$ , the inequalities (4) or (5) (for  $e \in E$  or  $e \in F_{GG'}$ , respectively) imply the existence of some  $e_{P'} \in P'$  such that  $x_{e_{P'}} = 1$ . Let  $\mathcal{P}$  denote the set of all such paths  $P'$ . Apparently, the collection  $\bigcup_{P' \in \mathcal{P}} \{e_{P'}\} \cup \{e\}$  is a  $v$ - $w$ -separating set of edges. Therefore, it contains some subset  $C$  that is a  $vw$ -cut. This gives  $x_f = 1$  via the inequality of (6) corresponding to  $C$ .

We turn to the proof of sufficiency. Assume there is no  $vw = f \in F_{GG'}$  such that  $e$  connects a pair of  $v$ - $w$ -cut-vertices in  $G$ . The construction of an affine independent  $|E'|$ -element-subset of  $S \subset X_{GG'}$  is analogous to the proof of Theorem 7. The assumption guarantees for any  $f \in F_{GG'}$  with  $f \neq e$  the existence of an  $f$ -feasible  $x \in S$  such that there is a  $vw$ -path  $P$  with  $x_P = 0$ . In particular, the hierarchy on  $F_{GG'}$  defined by the level function  $\ell$  remains unchanged (if  $e \in F_{GG'}$ , then  $\ell(e) \geq \ell(f)$  for all  $f \in F_{GG'}$ ). Hence,  $\dim \Sigma = |E'| - 1$ , which means  $\Sigma$  is a facet of  $\Xi_{GG'}$ .

**Proof of Theorem 9** Let  $S = \{x \in X_{GG'} \mid x_e = 0\}$  and put  $\Sigma = \text{conv } S$ .

Consider the case that  $e \in E$ . Let  $G_{[e]}$  and  $G'_{[e]}$  be the graphs obtained from  $G$  and  $G'$ , respectively, by contracting the edge  $e$ . The lifted multicuts  $x^{-1}(1)$  for  $x \in S$  correspond bijectively to the multicuts of  $G'_{[e]}$  lifted from  $G_{[e]}$ . This implies  $\dim \Sigma = \dim \Xi_{G_{[e]}G'_{[e]}}$ . The claim follows from Theorem 7 and the fact that  $G'_{[e]}$  has  $|E'| - 1$  many edges if and only if  $e$  is not contained in any triangle in  $G'$ .

Now, suppose  $uv = e \in F_{GG'}$ . We show necessity of Conditions (a)-(c) by proving that if any of them is violated, then all  $x \in S$  satisfy some additional, orthogonal equality and thus,  $\dim \Sigma \leq |E'| - 2$ .

First, assume that (a) is violated. Hence, there are edges  $e', e'' \in E'$  such that  $T = \{e, e', e''\}$  is a triangle in  $G'$ . Every  $x \in S$  satisfies the cycle inequalities

$$x_{e'} \leq x_e + x_{e''} \quad (57)$$

$$x_{e''} \leq x_e + x_{e'} \quad (58)$$

by Lemma 3 applied to the multicut  $x^{-1}(1)$  of  $G'$ . Every  $x \in S$  satisfies  $x_{e'} = x_{e''}$ , by (57) and (58) and  $x_e = 0$ .

Next, assume that (b) is violated. Consider a violating pair  $\{u', v'\} \neq \{u, v\}$ ,  $u' \neq v'$  of  $u$ - $v$ -cut-vertices. For every  $x \in S$ , there exists a  $uv$ -path  $P$  in  $G$  with  $x_P = 0$ , as  $x_e = 0$ . Any such path  $P$  has a sub-path  $P'$  from  $u'$  to  $v'$  because  $u'$  and  $v'$  are  $u$ - $v$ -cut-vertices.

- If the distance of  $u'$  and  $v'$  in  $G'$  is 1, then  $u'v' \in E'$ . If  $u'v' \in P$ , then  $x_{u'v'} = 0$  because  $x_P = 0$ . Otherwise,

$x_{u'v'} = 0$  by  $x_P = 0$  and the cycle/path inequality

$$x_{u'v'} \leq \sum_{\hat{e} \in P'} x_{\hat{e}}. \quad (59)$$

Thus  $x_{u'v'} = 0$  for all  $x \in S$ .

- If the distance of  $u'$  and  $v'$  in  $G'$  is 2, there is a  $u'v'$ -path in  $G'$  consisting of two distinct edges  $e', e'' \in E'$ . We show that all  $x \in S$  satisfy  $x_{e'} = x_{e''}$ :

- If  $e' \in P$  and  $e'' \in P$  then  $x_{e'} = x_{e''} = 0$  because  $x_P = 0$ .
- If  $e' \in P$  and  $e'' \notin P$  then  $x_{e'} = x_{e''} = 0$  by  $x_P = 0$  and the cycle/path inequality

$$x_{e''} \leq \sum_{\hat{e} \in P' \setminus \{e'\}} x_{\hat{e}}. \quad (60)$$

- If  $e' \notin P$  and  $e'' \notin P$  then  $x_{e'} = x_{e''}$  by  $x_P = 0$  and the cycle/path inequalities

$$x_{e''} \leq x_{e'} + \sum_{\hat{e} \in P'} x_{\hat{e}} \quad (61)$$

$$x_{e'} \leq x_{e''} + \sum_{\hat{e} \in P'} x_{\hat{e}}. \quad (62)$$

Now, assume that (c) is violated. Hence, there exists a  $u$ - $v$ -cut-vertex  $t$  and a  $u$ - $v$ -separating set of vertices  $\{s, s'\}$  such that  $\{ts, ts', ss'\}$  is a triangle in  $G'$ . We have that all  $x \in S$  satisfy  $x_{ss'} = x_{ts} + x_{ts'}$  as follows. At most one of  $x_{ts}$  and  $x_{ts'}$  is 1, because  $t$  is a  $u$ - $v$ -cut-vertex and  $\{s, s'\}$  is  $u$ - $v$ -separating as well. Moreover,  $x_{ts} + x_{ts'} = 0$  if and only if  $x_{ss'} = 0$ .

**Proof of Theorem 10** Note that both  $C$  and  $P \cup \{f\}$  are cycles in  $G'$ . We show that, for any chordal cycle  $C'$  of  $G'$  and any  $e \in C'$ , the inequality

$$x_e \leq \sum_{e' \in C' \setminus \{e\}} x_{e'} \quad (63)$$

is not facet-defining for  $\Xi_{G'}$ . This implies that (63) cannot be facet-defining for  $\Xi_{GG'}$  either, as  $\Xi_{GG'} \subseteq \Xi_{G'}$  and  $\dim \Xi_{GG'} = \dim \Xi_{G'}$ . Hence, for facet-definingness of (4) and (5), it is necessary that  $C$  and  $P \cup \{f\}$  be chordless in  $G'$ .

For this purpose, consider some cycle  $C'$  of  $G'$  with a chord  $uv = e' \in E'$ . We may write  $C' = P_1 \cup P_2$  where  $P_1$  and  $P_2$  are edge-disjoint  $uv$ -paths such that  $C_1 = P_1 \cup \{e'\}$  and  $C_2 = P_2 \cup \{e'\}$  are cycles in  $G'$ . Let  $e \in C'$ , then either  $e \in P_1$  or  $e \in P_2$ . W.l.o.g. we may assume  $e \in P_1$ . The inequalities

$$x_e \leq \sum_{e'' \in C_1 \setminus \{e\}} x_{e''}, \quad (64)$$

$$x_{e'} \leq \sum_{e'' \in C_2 \setminus \{e'\}} x_{e''} \quad (65)$$

are both valid for  $\Xi_{G'}$ . Moreover, since  $e' \in C_1$ , (64) and (65) imply (63) via

$$\begin{aligned} x_e &\leq \sum_{e'' \in C_1 \setminus \{e\}} x_{e''} = \sum_{e'' \in C_1 \setminus \{e, e'\}} x_{e''} + x_{e'} \\ &\leq \sum_{e'' \in C_1 \setminus \{e, e'\}} x_{e''} + \sum_{e'' \in C_2 \setminus \{e'\}} x_{e''} \\ &= \sum_{e'' \in C' \setminus \{e\}} x_{e''}. \end{aligned} \quad (66)$$

Thus, (63) is not facet-defining for  $\Xi_{G'}$ .

For the proof of sufficiency, suppose the cycle  $C$  of  $G$  is chordless in  $G'$  and let  $e \in C$ . Let  $\Sigma$  be a facet of  $\Xi_{GG'}$  such that  $\Sigma_{GG'}(e, C) \subseteq \Sigma$  and suppose it is induced by the inequality

$$\sum_{e' \in E'} a_{e'} x_{e'} \leq \alpha \quad (67)$$

with  $a \in \mathbb{R}^{E'}$  and  $\alpha \in \mathbb{R}$ , i.e.,  $\Sigma = \text{conv } S$ , where

$$S := \left\{ x \in X_{GG'} \mid \sum_{e' \in E'} a_{e'} x_{e'} = \alpha \right\}. \quad (68)$$

For convenience, we also define the linear space

$$L := \left\{ x \in \mathbb{R}^{E'} \mid \sum_{e' \in E'} a_{e'} x_{e'} = \alpha \right\}. \quad (69)$$

As  $0 \in S_{GG'}(e, C) \subseteq S$ , we have  $\alpha = 0$ . We show that (67) is a scalar multiple of (4) and thus  $\Sigma_{GG'}(e, C) = \Sigma$ .

Let  $y \in \{0, 1\}^{E'}$  be defined by

$$y_C = 0, \quad y_{E' \setminus C} = 1, \quad (70)$$

i.e. all edges except  $C$  are cut. Then  $y \in S_{GG'}(e, C) \subseteq S$ , since  $C$  is chordless.

For any  $e' \in C \setminus \{e\}$ , the vector  $x \in \{0, 1\}^{E'}$  with

$$x_{C \setminus \{e, e'\}} = 0, \quad x_{E' \setminus C \cup \{e, e'\}} = 1 \quad (71)$$

holds  $x \in S_{GG'}(e, C) \subseteq S$ . Therefore,  $y - x \in L$ . Thus,

$$\forall e' \in C \setminus \{e\}: \quad a_{e'} = -a_e. \quad (72)$$

It remains to show that  $a_{e'} = 0$  for all edges  $e' \in E' \setminus C$ . We proceed by considering edges from  $E$  and  $F_{GG'}$  separately. We consider the nodes  $u, v \in V$  such that  $uv = e'$ . W.l.o.g., we assume that  $v$  does not belong to  $C$ . This is possible because  $C$  does not have a chord in  $G'$ .

Firstly, consider  $e' \in E$  and distinguish the following cases:

- (i) If  $e'$  connects two nodes not contained in  $C$  or it is the only edge connecting some node in  $C$  to  $v$ , then for  $x \in \{0, 1\}^{E'}$ , defined by

$$x_C = 0, \quad x_{e'} = 0, \quad x_{E' \setminus (C \cup \{e'\})} = 1, \quad (73)$$

it holds that  $x \in S_{GG'}(e, C) \subseteq S$ . Therefore,  $y - x \in L$ , which evaluates to  $a_{e'} = 0$ .

- (ii) Otherwise, let  $E'_{C,v} := \{\{u', v\} \in E' \mid u' \text{ belongs to } C\}$  denote the set of edges in  $E'$  that connect  $v$  to some node in  $C$ . By assumption, we have that  $|E'_{C,v}| \geq 2$ . Now, pick some direction on  $C$  and traverse  $C$  from one endpoint of  $e$  to the other endpoint of  $e$ . We may order the edges  $E'_{C,v} = \{e_1, \dots, e_k\}$  such that the endpoint of  $e_i$  appears before the endpoint of  $e_{i+1}$  in the traversal of  $C$ . We show that  $a_{e_i} = 0$  for all  $1 \leq i \leq k$ :

For the vector  $x \in \{0, 1\}^{E'}$  defined by

$$x_{e''} = \begin{cases} 0 & \text{if } e'' \in C \\ 0 & \text{if } e'' \in E'_{C,v} \\ 1 & \text{else,} \end{cases} \quad (74)$$

it holds that  $x \in S_{GG'}(e, C) \subseteq S$ . Therefore,  $y - x \in L$ . Thus:

$$\sum_{1 \leq i \leq k} a_{e_i} = 0. \quad (75)$$

Consider the  $m \in \{1, \dots, k\}$  such that  $e' = e_m$ . For any  $i$  with  $1 \leq i \leq m - 1$ , consider the following construction that is illustrated also in Fig. 2: Let  $e'' \in C$  be some edge between the endpoints of  $e_i$  and  $e_{i+1}$ . If  $e_i \in E$ , define  $x \in \{0, 1\}^{E'}$  via

$$x_e = x_{e'} = 1 \quad (76)$$

$$x_{C \setminus \{e, e''\}} = 0 \quad (77)$$

$$\forall j \leq i: x_{e_j} = 0 \quad (78)$$

$$\forall j > i: x_{e_j} = 1 \quad (79)$$

If  $e_i \in F_{GG'}$ , define  $x \in \{0, 1\}^{E'}$  via

$$x_e = x_{e'} = 1 \quad (80)$$

$$x_{C \setminus \{e, e''\}} = 0 \quad (81)$$

$$\forall j \leq i: x_{e_j} = 1 \quad (82)$$

$$\forall j > i: x_{e_j} = 0 \quad (83)$$

Either way, it holds that  $x \in S_{GG'}(e, C) \subseteq S$  and thus,  $y - x \in L$ . If  $e_i \in E$ , this yields

$$0 = \sum_{1 \leq j \leq i} a_{e_j} - a_e - a_{e''} = \sum_{1 \leq j \leq i} a_{e_j} \quad (84)$$

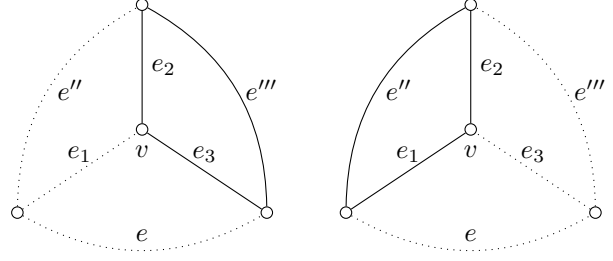

Figure 2. The figure illustrates the argument from case (ii) in the proof of Theorem 10 for the cycle  $C = \{e, e'', e'''\}$ . In this example,  $e_3 = e'$ ,  $e_1 \in F_{GG'}$  and  $e_2 \in E$ . The left multicut is chosen for  $i = 1$  and the right one for  $i = 2$ .

by (72). If  $e_i \in F_{GG'}$ , we similarly obtain

$$0 = \sum_{i+1 \leq j \leq k} a_{e_j} - a_e - a_{e''} = \sum_{i+1 \leq j \leq k} a_{e_j}. \quad (85)$$

Together with (75), this yields  $\sum_{1 \leq j \leq i} a_{e_j} = 0$  as well. Applying this argument repeatedly from  $i = 1$  to  $i = m - 1$ , we conclude that  $a_{e_1} = \dots = a_{e_{m-1}} = 0$ . By reversing the order of the edges in  $E'_{C,v}$ , it can be shown analogously that  $a_{e_k} = a_{e_{k-1}} = \dots = a_{e_{m+1}} = 0$ . Thus, by (75),  $a_{e'} = a_{e_m} = 0$ .

Next, consider  $e' \in F_{GG'}$  and distinguish the following additional cases:

- (iii) Suppose there is a  $uv$ -path  $P'$  in  $G$  that does not contain any node from  $C$ . Define  $x \in \{0, 1\}^{E'}$  via

$$x_{e''} = \begin{cases} 0 & \text{if } e'' \in C \\ 0 & \text{if } e'' = e' \\ 0 & \text{if } e'' \in P' \text{ or } e'' \text{ is a chord of } P' \\ 1 & \text{else.} \end{cases} \quad (86)$$

Then  $x \in S_{GG'}(e, C) \subseteq S$  and thus  $y - x \in L$ . This gives

$$a_{e'} + \sum_{e'' \in P'} a_{e''} + \sum_{\substack{e'' \text{ chord} \\ \text{of } P'}} a_{e''} = 0. \quad (87)$$

We argue that all terms except  $a_{e'}$  vanish by induction over the level function  $\ell(e')$ . If  $\ell(e') = 1$ , then  $P'$  does not have any chords from  $F_{GG'}$ , thus  $a_{e'} = 0$ , because  $a_{e''} = 0$  for all  $e'' \in E$  as shown previously in the cases (i) and (ii). If  $\ell(e') > 1$ , then for any chord  $e'' \in F_{GG'}$  of  $P'$  it holds that  $\ell(e'') < \ell(e')$ . The induction hypothesis provides  $a_{e''} = 0$  and hence we conclude  $a_{e'} = 0$ .

- (iv) Suppose  $u$  is contained in  $C$ . Pick a shortest  $uv$ -path  $P'$  in  $G$ . We argue inductively over the length of  $P'$ ,

which we denote by  $d(P')$ . If  $d(P') = 1$ , then  $P'$  consists of only one edge from  $E$ . This situation is in fact already covered by case (ii). If  $d(P') > 1$ , then we employ an argument similar to (ii) as follows. Let  $F_{C,v} := \{\{u',v\} \in F_{GG'} \mid u' \text{ belongs to } C\} = \{f_1, \dots, f_k\}$  be the set of edges  $f_i \in F_{GG'}$  that connect  $v$  to some node in  $C$ . Again, assume they are ordered such that the endpoint of  $f_i$  appears before the endpoint of  $f_{i+1}$  on  $C$  in a traversal from  $e$  to itself. For the vector  $x \in \{0, 1\}^{E'}$  defined by

$$x_{e''} = \begin{cases} 0 & \text{if } e'' \in C \\ 0 & \text{if } e'' \in P' \text{ or } e'' \text{ is a chord of } P' \\ 0 & \text{if } e'' = u'v' \text{ where } u' \text{ belongs to } C, \\ & v' \neq v \text{ belongs to } P' \\ 0 & \text{if } e'' \in F_{C,v} \\ 1 & \text{else,} \end{cases} \quad (88)$$

it holds that  $x \in S_{GG'}(e, C) \subseteq S$  and thus  $y - x \in L$ . This yields

$$\begin{aligned} & \sum_{e'' \in P'} a_{e''} + \sum_{\substack{e'' \text{ chord} \\ \text{of } P'}} a_{e''} \\ & + \sum_{\substack{e'' = u'v': \\ u' \text{ belongs to } C, \\ v' \neq v \text{ belongs to } P'}} a_{e''} + \sum_{e'' \in F_{C,v}} a_{e''} = 0 \end{aligned} \quad (89)$$

and thus

$$\sum_{1 \leq i \leq k} a_{f_i} = \sum_{e'' \in F_{C,v}} a_{e''} = 0, \quad (90)$$

as all other terms vanish (apply the induction hypothesis to all  $u'v' \in F_{GG'}$  where  $u'$  belongs to  $C$  and  $v' \neq v$  belongs to  $P'$ ). Let  $m$  be the highest index such that the endpoint of  $f_m$  appears before the endpoint of  $P'$  on  $C$ . Now, for any  $i$  with  $1 \leq i \leq m$ , pick an edge  $e'' \in C$  between the endpoint of  $f_i$  and the endpoint of  $f_{i+1}$  and before the endpoint of  $P'$  on  $C$ . Define  $x \in \{0, 1\}^{E'}$  by

$$x_g = \begin{cases} 0 & \text{if } g \in C \setminus \{e, e''\} \\ 0 & \text{if } g \in P' \text{ or } g \text{ is a chord of } P' \\ 0 & \text{if } g = u'v' \text{ where} \\ & u' \text{ appears before endpoint of } P' \text{ on } C, \\ & v' \neq v \text{ belongs to } P' \\ 0 & \text{if } g = f_j \forall j > i \\ 1 & \text{else.} \end{cases} \quad (91)$$

Then, it holds that  $x \in S_{GG'}(e, C) \subseteq S$  and thus  $y - x \in L$ . This yields, after removing all zero terms

(apply the induction hypothesis once more),

$$\sum_{i+1 \leq j \leq k} a_{f_j} = 0. \quad (92)$$

Together with (90), we obtain

$$\sum_{1 \leq j \leq i} a_{f_j} = 0. \quad (93)$$

Applying this argument repeatedly for  $i = 1$  to  $i = m$ , we conclude  $a_{f_1} = \dots = a_{f_m} = 0$ . Similarly, we obtain  $a_{f_k} = a_{f_{k-1}} = \dots = a_{f_m} = 0$ , by reversing the direction of traversal of  $C$  and employing the same reasoning.

(v) Finally, suppose neither  $u$  nor  $v$  belong to the cycle  $C$ , but every  $uv$ -path in  $G$  shares at least one node with  $C$ . Let  $P'$  be such a  $uv$ -path. Define the vector  $x \in \{0, 1\}^{E'}$  by

$$x_{e''} = \begin{cases} 0 & \text{if } e'' \in C \\ 0 & \text{if } e'' = e' \\ 0 & \text{if } e'' \in P' \text{ or } e'' \text{ is a chord of } P' \\ 0 & \text{if } e'' = u'v' \text{ where } u' \text{ belongs to } C, \\ & v' \text{ belongs to } P' \\ 1 & \text{else.} \end{cases} \quad (94)$$

It holds that  $x \in S_{GG'}(e, C) \subseteq S$  and thus  $y - x \in L$ . This gives

$$a_{e'} + \sum_{e'' \in P'} a_{e''} + \sum_{\substack{e'' \text{ chord} \\ \text{of } P'}} a_{e''} + \sum_{\substack{e'' = u'v': \\ u' \text{ belongs to } C, \\ v' \text{ belongs to } P'}} a_{e''} = 0. \quad (95)$$

We argue inductively over the level function  $\ell(e')$ . If  $\ell(e') = 1$ , then  $P'$  does not have any chords and our consideration in cases (i)–(iv) yield that all terms except  $a_{e'}$  vanish. If  $\ell(e') > 1$ , then we additionally employ the induction hypothesis to achieve the same result. Hence, it holds that  $a_{e'} = 0$  as well.

The proof of sufficiency in the second assertion is completely analogous (replace  $C$  by  $P \cup \{f\}$  and  $e$  by  $f$ ). The chosen multicuts remain valid, because  $e = f$  is the only edge in the cycle that is not contained in  $E$ .

**Proposition 1** For every connected graph  $G = (V, E)$ , every graph  $G' = (V, E')$  with  $E \subseteq E'$ , every  $vw \in F_{GG'}$  and every  $C \in vw\text{-cuts}(G)$ , the following holds:

(a) Every  $x \in S_{GG'}(vw, C)$  defines a decomposition of  $G$  into  $(vw, C)$ -connected components. That is, every maximal component of the graph  $(V, \{e \in E \mid x_e = 0\})$  is  $(vw, C)$ -connected. At most one of these is properly  $(vw, C)$ -connected. It exists iff  $x_{vw} = 0$ .



(b) For every  $(vw, C)$ -connected component  $(V^*, E^*)$  of  $G$ , the  $x \in \{0, 1\}^{E'}$  such that  $\forall rs \in E' (x_{rs} = 0 \Leftrightarrow r \in V^* \wedge s \in V^*)$  is such that  $x \in S_{GG'}(vw, C)$ .

**Proof of Proposition 1** a) Let  $x \in S_{GG'}(vw, C)$  arbitrary. Let  $E_0 := \{e \in E | x_e = 0\}$  and let  $G_0 := (V, E_0)$ .

If  $x_{vw} = 1$  then  $\forall e \in C : x_e = 1$ , by (35). Thus, every component of  $G_0$  is improperly  $(vw, C)$ -connected.

If  $x_{vw} = 0$  then

$$\exists e \in C (x_e = 0 \wedge \forall e' \in C \setminus \{e\} (x_{e'} = 1)) \quad (96)$$

by (35). Let  $(V^*, E^*)$  the maximal component of  $G_0$  with

$$e \in E^* . \quad (97)$$

Clearly:

$$\forall e' \in C \setminus \{e\} : e' \notin E^* \quad (98)$$

by (96) and definition of  $G_0$ . There does not exist a  $C' \in vw$ -cuts( $G$ ) with  $x_{C'} = 1$ , because this would imply  $x_{vw} = 1$ , by (6). Thus, there exists a  $P \in vw$ -paths( $G$ ) with  $x_P = 0$ , as  $G$  is connected. Any such path  $P$  has  $e \in P$ , as  $P \cap C \neq \emptyset$  and  $C \cap E_0 = \{e\}$  and  $P \subseteq E_0$ . Thus:

$$v \in V^* \wedge w \in V^* \quad (99)$$

by (97).  $(V^*, E^*)$  is properly  $(vw, C)$ -connected, by (97), (98) and (99). Any other component of  $G_0$  does not cross the cut, by (96), (97) and definition of  $G_0$ , and is thus improperly  $(vw, C)$ -connected.

b) We have

$$\forall st \in E : x_{st} = 0 \Leftrightarrow st \in E^* \quad (100)$$

by the following argument:

- If  $st \in E^*$ , then  $s \in V^* \wedge t \in V^*$ , as  $(V^*, E^*)$  is a graph. Thus,  $x_{st} = 0$ , by definition of  $x$ .
- If  $st \notin E^*$  then  $s \notin V^* \vee t \notin V^*$ , as  $(V^*, E^*)$  is a component of  $G$ . Thus,  $x_{st} = 1$ , by definition of  $x$ .

Consider the decomposition of  $G$  into  $(V^*, E^*)$  and singleton components.  $E_1 := \{e \in E | x_e = 1\}$  is the set of edges that straddle distinct components of this decomposition, by (100). Therefore,  $E_1$  is a multicut of  $G$ , by Lemma 2. Thus, (4) holds, by Lemma 3.

For any  $st \in F_{GG'}$  and any  $P \in st$ -paths( $G$ ), distinguish two cases:

- If  $P \subseteq E^*$ , then  $s \in V^* \wedge t \in V^*$ , as  $(V^*, E^*)$  is a graph. Thus,  $x_{st} = 0$ , by definition of  $x$ . Moreover,  $x_P = 0$ , by (100). Hence, (5) evaluates to  $0 = 0$ .

- Otherwise, there exists an  $e \in P$  such that  $e \notin E^*$ . Therefore,  $x_e = 1$ , by (100). Thus, (5) holds, as the r.h.s. is at least 1.

For any  $st \in F_{GG'}$  and any  $C' \in st$ -cuts( $G$ ), distinguish two cases:

- If  $C' \cap E^* = \emptyset$  then  $s \notin V^* \vee t \notin V^*$ . Therefore,  $x_{st} = 1$ , by definition of  $x$ . Moreover,  $x_{C'} = 1$ , by (100). Thus, (6) evaluates to  $0 = 0$ .
- Otherwise, there exists an  $e \in C'$  such that  $e \in E^*$ . Therefore,  $x_e = 0$ , by (100). Thus, (6) holds, as the r.h.s. is at least 1.

**Proof of Theorem 11** Assume that C1 does not hold (as in Fig. 4a). Then, there exists an  $e \in C$  such that no  $(vw, C)$ -connected component of  $G$  contains  $e$ . Thus, for all  $x \in S_{GG'}(vw, C)$ :

$$x_e = 1 \quad (101)$$

by Proposition 1. Now,  $\dim \Sigma_{GG'}(vw, C) \leq |E'| - 2$ , by (35) and (101). Thus,  $\Sigma_{GG'}(vw, C)$  is not a facet of  $\Xi_{GG'}$ , by Theorem 7.

Assume that C2 does not hold. Then, for any  $e \in C$  there exists some number  $m$  such that for all  $(vw, C)$ -connected components  $(V^*, E^*)$  with  $e \in E^*$  it holds that  $|F \cap F_{V^*}| = m$ . Thus, we can write

$$C = \bigcup_{m=0}^{|F|} C(F, m), \quad (102)$$

where  $C(F, m) := \{e \in C \mid |F \cap F_{V^*}| = m \forall (vw, C)$ -connected  $(V^*, E^*)$  with  $e \in E^*\}$ . It follows that for all  $x \in S_{GG'}(vw, C)$  we have the equality

$$\sum_{m=0}^{|F|} m \sum_{e \in C(F, m)} (1 - x_e) = \sum_{f' \in F} (1 - x_{f'}) \quad (103)$$

by the following argument:

- If  $x_e = 1$  for all  $e \in C$ , then  $x_{f'} = 1$  for all  $v'w' = f' \in F$ , since  $C$  is also a  $v'w'$ -cut. Thus, (103) evaluates to  $0 = 0$ .
- Otherwise there exists precisely one edge  $e \in C$  such that  $x_e = 0$ . Let  $m$  be such that  $e \in C(F, m)$ . By definition of  $C(F, m)$ , there are exactly  $m$  edges  $f' \in F$  with  $x_{f'} = 0$ . Thus, (103) evaluates to  $m = m$ .

Assume that condition C3 does not hold. Then there exists an  $f' \in F_{GG'}(vw, C)$ , a set  $\emptyset \neq F \subseteq F_{GG'}(vw, C)$  and

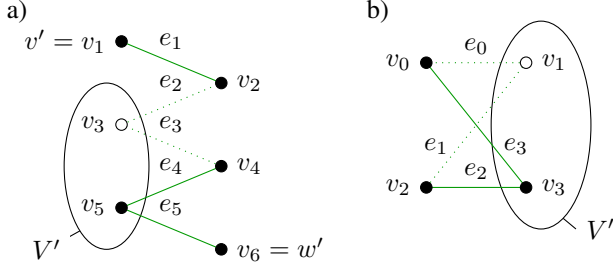

Figure 3. Depicted are the nodes (in black) and edges (in green) on a path (a) and on a cycle (b), respectively. Nodes in the set  $V'$  are either in  $V^*$  (filled circle) or not in  $V^*$  (open circle). Consequently, pairs of consecutive edges are either cut (dotted lines) or not cut (solid lines).

some  $k \in \mathbb{N}$  such that for all  $(vw, C)$  connected components  $(V^*, E^*)$  and  $(V^{**}, E^{**})$  with  $f' \in F_{V^*}$  and  $f' \notin F_{V^{**}}$  it holds that

$$|F \cap F_{V^*}| = k \text{ and } |F \cap F_{V^{**}}| = 0. \quad (104)$$

In other words, for all  $x \in S_{GG'}(vw, C)$  it holds that  $x_{f'} = 0$  iff there are exactly  $k$  edges  $f'' \in F$  such that  $x_{f''} = 0$ . Similarly, it holds that  $x_{f'} = 1$  iff for all  $f'' \in F$  we have  $x_{f''} = 1$ . Therefore, all  $x \in S_{GG'}(vw, C)$  satisfy the additional equality

$$k(1 - x_{f'}) = \sum_{f'' \in F} 1 - x_{f''}. \quad (105)$$

Assume that C4 does not hold. Then, there exist  $v' \in V(v, C)$  and  $w' \in V(w, C)$  and a  $v'w'$ -path  $P = (V_P, E_P)$  in  $G'(vw, C)$  such that every properly  $(vw, C)$ -connected component  $(V^*, E^*)$  of  $G$  holds:

$$(v' \in V^* \wedge V(w, C) \cap V_P \subseteq V^*) \quad (106)$$

$$\vee (w' \in V^* \wedge V(v, C) \cap V_P \subseteq V^*). \quad (107)$$

Let  $v_1 < \dots < v_{|V_P|}$  the linear order of the nodes  $V_P$  and let  $e_1 < \dots < e_{|E_P|}$  the linear order of the edges  $E_P$  in the  $v'w'$ -path  $P$ . Now, for all  $x \in S_{GG'}(vw, C)$ :

$$x_{vw} = \sum_{j=1}^{|E_P|} (-1)^{j+1} x_{e_j} \quad (108)$$

by the following argument:  $|E_P|$  is odd, as the path  $P$  alternates between the set  $V(v, C)$  where it begins and the set  $V(w, C)$  where it ends. Thus,

$$\sum_{j=1}^{|E_P|} (-1)^{j+1} x_{e_j} = x_{e_1} - \sum_{j=1}^{(|E_P|-1)/2} (x_{e_{2j}} - x_{e_{2j+1}}). \quad (109)$$

Distinguish two cases:

- If  $x_{vw} = 1$ , then  $x_{E_P} = 1$ , by (35) and (6). Thus, (108) evaluates to  $1 = 1$ , by (109).
- If  $x_{vw} = 0$ , the decomposition of  $G$  defined by  $x$  contains precisely one properly  $(vw, C)$ -connected component  $(V^*, E^*)$  of  $G$ , by Proposition 1. Without loss of generality, (106) holds. Otherwise, that is, if (107) holds, exchange  $v$  and  $w$ .

Consider the nodes  $V_P$  as depicted in Fig. 3a:  $v_1 = v' \in V^*$ , by (106). For every even  $j$ ,  $v_j \in V(w, C)$ , by definition of  $P$ . Thus:

$$\forall j \in \{1, \dots, (|E_P| + 1)/2\} : v_{2j} \in V^* \quad (110)$$

by (106).

Consider the edges  $E_P$  as depicted in Fig. 3a:  $e_1 = v_1v_2 \in E^*$ , as  $v_1 \in V^*$  and  $v_2 \in V^*$  and as  $(V^*, E^*)$  is a component of  $G$ . Thus,

$$x_{e_1} = 0 \quad (111)$$

by Proposition 1. For every  $j \in \{1, \dots, (|E_P| - 1)/2\}$ , distinguish two cases:

- If  $v_{2j+1} \in V^*$ , then  $e_{2j} = v_{2j}v_{2j+1} \in E^*$  and  $e_{2j+1} = v_{2j+1}v_{2j+2} \in E^*$ , because  $v_{2j} \in V^*$  and  $v_{2j+2} \in V^*$ , by (110), and because  $(V^*, E^*)$  is a component of  $G$ . Thus:

$$x_{e_{2j}} = 0 \wedge x_{e_{2j+1}} = 0. \quad (112)$$

- If  $v_{2j+1} \notin V^*$ , then  $e_{2j} = v_{2j}v_{2j+1}$  and  $e_{2j+1} = v_{2j+1}v_{2j+2}$  straddle distinct components of the decomposition of  $G$  defined by  $x$ , because  $v_{2j} \in V^*$  and  $v_{2j+2} \in V^*$ , by (110). Thus:

$$x_{e_{2j}} = 1 \wedge x_{e_{2j+1}} = 1. \quad (113)$$

In any case:

$$\forall j \in \{1, \dots, (|E_P| - 1)/2\} : x_{e_{2j}} - x_{e_{2j+1}} = 0. \quad (114)$$

Thus, (108) evaluates to  $0 = 0$ , by (109), (111), (114).

Assume that C5 does not hold. Then, there exists a cycle  $Y = (V_Y, E_Y)$  in  $G'(vw, C)$  such that every properly  $(vw, C)$ -connected component  $(V^*, E^*)$  of  $G$  holds:

$$V_Y \cap V(v, C) \subseteq V^* \quad (115)$$

$$\vee V_Y \cap V(w, C) \subseteq V^*. \quad (116)$$

Let  $v_0 < \dots < v_{|V_Y|-1}$  an order on  $V_Y$  such that  $v_0 \in V(v, C)$  and, for all  $j \in \{0, \dots, |E_Y| - 1\}$ :

$$e_j := \{v_j, v_{j+1 \bmod |E_Y|}\} \in E_Y. \quad (117)$$

Now, for all  $x \in S_{GG'}(vw, C)$ :

$$0 = \sum_{j=0}^{|E_Y|-1} (-1)^j x_{e_j} \quad (118)$$

by the following argument:  $|E_Y|$  is even, as the cycle  $Y$  alternates between the sets  $V(v, C)$  and  $V(w, C)$ . Thus,

$$\sum_{j=0}^{|E_Y|-1} (-1)^j x_{e_j} = \sum_{j=0}^{(|E_Y|-2)/2} (x_{e_{2j}} - x_{e_{2j+1}}) . \quad (119)$$

Distinguish two cases:

- If  $x_{vw} = 1$ , then  $x_{E_Y} = 1$ , by (35) and (6). Thus, (118) evaluates to  $0 = 0$ , by (119).
- If  $x_{vw} = 0$ , the decomposition of  $G$  defined by  $x$  contains precisely one properly  $(vw, C)$ -connected component  $(V^*, E^*)$  of  $G$ , by Proposition 1. Without loss of generality, (115) holds. Otherwise, that is, if (116) holds, exchange  $v$  and  $w$ .

Consider the nodes  $V_Y$  as depicted in Fig. 3b: For every even  $j$ ,  $v_j \in V(v, C)$ , by definition of  $Y$  and the order. Thus:

$$\forall j \in \{0, \dots, (|E_Y| - 2)/2\} : v_{2j} \in V^* \quad (120)$$

by (115).

Consider the edges  $E_Y$  as depicted in Fig. 3b: For every  $j \in \{0, \dots, (|E_Y| - 2)/2\}$ , distinguish two cases:

- If  $v_{2j+1} \in V^*$ , then  $e_{2j} = v_{2j}v_{2j+1} \in E^*$  and  $e_{2j+1} = v_{2j+1}v_{2j+2 \bmod |E_Y|} \in E^*$ , because  $v_{2j} \in V^*$  and  $v_{2j+2 \bmod |E_Y|} \in V^*$ , by (120), and because  $(V^*, E^*)$  is a component of  $G$ . Thus:

$$x_{e_{2j}} = 0 \wedge x_{e_{2j+1}} = 0 . \quad (121)$$

- If  $v_{2j+1} \notin V^*$ , then  $e_{2j} = v_{2j}v_{2j+1}$  and  $e_{2j+1} = v_{2j+1}v_{2j+2 \bmod |E_Y|}$  straddle distinct components of the decomposition of  $G$  defined by  $x$ , because  $v_{2j} \in V^*$  and  $v_{2j+2 \bmod |E_Y|} \in V^*$ , by (120). Thus:

$$x_{e_{2j}} = 1 \wedge x_{e_{2j+1}} = 1 . \quad (122)$$

In any case:

$$\forall j \in \{0, \dots, (|E_Y| - 2)/2\} : x_{e_{2j}} - x_{e_{2j+1}} = 0 . \quad (123)$$

Thus, (118) evaluates to  $0 = 0$ , by (119) and (123).

## Acknowledgements

The examples depicted in Fig. 4h and 4j were proposed by Banafsheh Grochulla and Ashkan Mokarian, respectively.

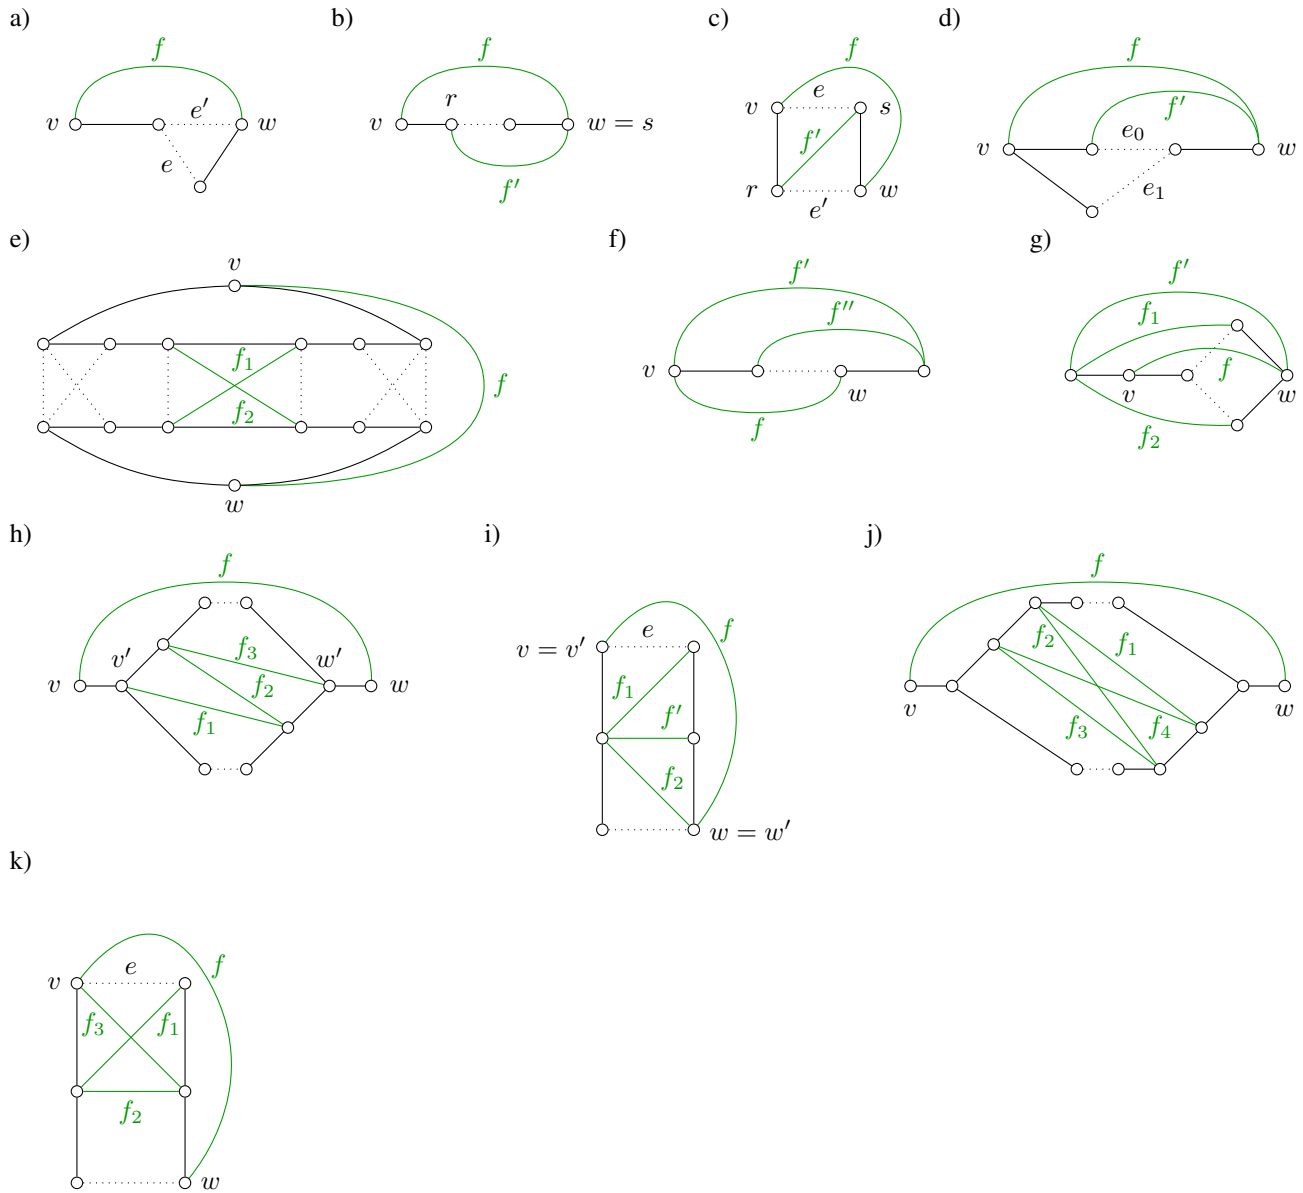

Figure 4. Depicted above are graphs  $G = (V, E)$  (in black) and  $G' = (V, E')$  with  $E \subseteq E'$  ( $E'$  in green), distinct nodes  $v, w \in V$  and a  $vw$ -cut  $C$  of  $G$  (as dotted lines). In any of the above examples, one condition of Theorem 11 is violated and thus,  $\Sigma_{GG'}(vw, C)$  is not a facet of the lifted multicut polytope  $\Xi_{GG'}$ . **a)** Condition C1 is violated for  $e$ . **b)** Condition C2 is violated as  $r$  and  $s$  are connected in any  $(vw, C)$ -connected component. **c)** Condition C2 is violated as  $r$  and  $s$  are not connected in any  $(vw, C)$ -connected component. **d)** Condition C2 is violated. Specifically,  $C(\{f'\}, 1) = \{e_0\}$  and  $C(\{f'\}, 0) = \{e_1\}$  in the proof of Theorem 11. **e)** Condition C2 is violated for  $F = \{f_1, f_2\}$ . **f)** Condition C3 is violated. **g)** Condition C3 is violated for  $F = \{f_1, f_2\}$  and  $k = 1$ . **h)** Condition C4 is violated for the  $v'w'$ -path  $f_1f_2f_3$ . **i)** Condition C4 is violated for the  $v'w'$ -path  $e f_1 f_2$ . **j)** Condition C5 is violated for the cycle  $f_1f_2f_3f_4$ . **k)** Condition C5 is violated for the cycle  $e f_1 f_2 f_3$ .
